# Supplementary material for: Overexpression of OsARD1 Improves Submergence, Drought, and Salt Tolerances of Seedling Through the Enhancement of Ethylene Synthesis in Rice
Source: Front Plant Sci. 2019 Sep 10;10:1088. doi: 10.3389/fpls.2019.01088 (PMC6746970; doi:10.3389/fpls.2019.01088)
Supplement: Supplementary file 2 [file Table_1.xlsx]

## Sheet: Sheet1
Supplementary table S1 Primers used for expression analysis
Primer	Sequence
OsActin1-F	5'-GACTCTGGTGATGGTGTCAGC-3'
OsActin1-R	5'-GGCTGGAAGAGGACCTCAGG-3'
ARD1-F	5'-GCGAGAACCTGAAGAGAATC-3'
ARD1-R	5'-CCTCCTTTCTTCAGTGCTAT-3'
OsAP37-F	5'-CCAGCAGCAATAGCACGGTA-3'
OsAP37-R	5'-GAGATCAACCACCGACGAGG-3'
OsAP59-F	5'-CAGCAGCTGGTGAGCTAAGT-3'
OsAP59-R	5'-GTGCTGCGCAATCATCCAAG-3'
OsBZIP23-F	5'-TTTCAAAGGTGGGCTGAGGG-3'
OsBZIP23-R	5'-GGTCCAACTTGTCGGCTCAT-3'
OsNCED4-F	5'-CAATGTCGTGTCCAAGCCGT-3'
OsNCED4-R	5'-ACGCCTTCTCCCTGTCGTAT-3'
OsNCED5-F	5'-CGACGTGATCAAGAAGCCATAC-3'
OsNCED5-R	5'-CCACACCATCTCCAACGAGC-3'
OsACS2-F	5'-ACACCAGGTGAAGCTGAACG-3'
OsACS2-R	5'-CGCCAATGGACTGGAGAGAT-3'
OsACS4-F	5'-TGTTCGTGTGGATGGACATG-3'
OsACS4-R	5'-TTACTGTTGCACATGCCCTT-3'
OsACS5-F	5'-TGTTCGTGTGGATGGACATG-3'
OsACS5-R	5'-CAGCTAGCTTGTTGCTTTGT-3'
OsACS6-F	5'-GGGTTTCGGGTTGGGGTAAT-3'
OsACS6-R	5'-AACTTGCTCATGTCTGCCCA-3'
OsPP108-F	5'-GGCAACGCCTTGTAGAGAGA-3'
OsPP108-R	5'-CAGTTGCACAACCCCATCAC-3'
OsSalT-F	5'-CCCAAGAAGCTGTTAGGCGT-3'
OsSalT-R	5'-TTGCGTCGATAAGCGTTCCA-3'
OsSub1C-F	5'-ACTCGCCTAATAATCTTGTC-3'
OsSub1C-R	5'-GCTGATTTATTCCTGCAAGG-3'
OsAdh1-F	5'-CAAAGCCACCAAAGGGTTCG-3'
OsAdh1-R	5'-TGTTGCCAGTGCATTCAACG-3'
